# Supplementary material for: Direct Repair Versus TLIF for Low-grade Isthmic Spondylolisthesis
Source: Research Square preprint supplement (doi:10.21203/rs.3.rs-4971086/v1), 2024-12-23
Supplement: Supplementary file 1 [file 5146e69ff0cb8506a537aecd.xlsx]

## Sheet: 钉勾组
一般信息					临床指标										FUT	手术相关指标						影像学资料
					VAS/lumbar			VAS/Leg			ODI（%）			Prolo评分								椎间隙高度												L5 滑移距离（slip distance， SD）								L5 滑移百分比（slipping percentage，SP）
																						术前椎间隙高度			术后椎间隙高度			术后6月椎间隙高度			末次随访椎间隙高度							OPpost复位率	FFU复位率		滑脱丢失率	术前
姓名	性别	年龄	职业、诱因	诊断	术前	术后	末次随访	术前	术后	末次随访	术前	术后	末次随访	末次随访		手术日期	手术节段	是否取髂骨	手术时长	出血量	并发症	椎间隙前缘	后缘		椎间隙前缘	后缘		椎间隙前缘	后缘		椎间隙前缘	后缘		术前	术后	术后6月	末次随访					椎体终板长度	术前		术后		术后6月	末次随访
1	M	33		腰5椎体峡部裂伴Ⅰ°滑脱	6	2	0	0	0	0	48	20	14	9	65	2009-04-22	L5	是	189	90	无	13.5	8.9	11.2	18.2	10.5	14.35	17.5	9.6	13.55	17.3	9.3	13.3	7.9	0	0	0	100	100	0	0	38.6	0.204663	20.4663	0	0	0	0	0
2	M	17	无	腰5椎体峡部裂滑脱	7	3	0	0	0	0	48	20	10	10	65	2009-09-07	L5	是	169	80	无	14.3	9.2	11.75	15.8	9.5	12.65	14.7	9.3	12	13.5	9.2	11.35	12.7	6.7	6.2	5.5	47.2441	56.6929	-9.44882	9.44882	39.3	0.323155	32.3155	0.170483	17.0483	0.157761	0.139949	13.9949
3	M	46		腰5椎峡部裂滑脱	7	2	2	0	0	0	75	23.33	2	10	57	2009-09-02	L5	是	218	55	无	22.5	7.7	15.1	19.3	10.8	15.05	15.6	9.8	12.7	19	11.9	15.45	4.6	0	0	0	100	100	0	0	39.6	0.116162	11.6162	0	0	0	0	0
4	M	23		腰5椎峡部裂滑脱	6	3	0	0	0	0	50	16	12	10	46	2009-09-09	L5	是	132	50	无	19.8	10.3	15.05	17.3	9.5	13.4	16.8	9.1	12.95	16.3	8.9	12.6	5.3	0	0	0	100	100	0	0	38.9	0.136247	13.6247	0	0	0	0	0
5	F	45		腰5椎滑脱症（Ⅰ°峡部裂）	5	3	0	0	0	0	50	25	14	9	60	2009.10.30	L5	否，局部碎骨粒	135	50	无	17.9	8.1	13	22.58	9.7	16.14	21.1	8.3	14.7	22.2	8.5	15.35	4.3	0	0	2.4	100	44.186	55.814	55.814	34.2	0.125731	12.5731	0	0	0	0.0701754	7.01754
6	F	44		腰5椎体峡部裂伴Ⅰ°滑脱	7	3	0	0	0	0	56	33.33	10	9	89	2009-09-25	L5	是	150	50	无	13.2	9.8	11.5	15.9	9.6	12.75	15.6	8.8	12.2	14.9	7.5	11.2	10.1	4.5	4.3	4.1	55.4455	59.4059	-3.9604	3.9604	40	0.2525	25.25	0.1125	11.25	0.1075	0.1025	10.25
7	M	16	无	腰5椎弓峡部裂滑脱	7	2	0	0	0	0	50	23.33	0	10	78	2010-08-10	L5	是	157	65	无	17.6	8.3	12.95	19.1	8.2	13.65	15.3	9.4	12.35	11.6	9.6	10.6	8.3	0	4.8	3.8	100	54.2169	45.7831	45.7831	39.3	0.211196	21.1196	0	0	0.122137	0.0966921	9.66921
8	F	38		腰5椎体滑脱症	7	3	0	0	0	0	56	23.3	12	9	58	2011-02-05	L5	是	150	70	无	10.3	7.8	9.05	12.6	8.9	10.75	12.3	8.3	10.3	11.9	7.9	9.9	17.6	5.2	6.5	6.6	70.4545	62.5	7.95455	7.95455	39.6	0.444444	44.4444	0.131313	13.1313	0.164141	0.166667	16.6667
9	M	23		腰5峡部裂滑脱	6	3	1	0	0	2	48	20	14	9	72	2011-12-05	L5	是	189	70	左腿酸痛	18.6	9.3	13.95	21.7	12.3	17	19.6	11.3	15.45	18.8	9.4	14.1	4.3	0	0	0	100	100	0	0	39.5	0.108861	10.8861	0	0	0	0	0
10	M	23	军人	腰5椎体峡部裂滑脱（Ⅰ°）	6	2	0	0	0	0	50	16	6	10	66	2011-08-08	L5	是	205	160	无	15.7	8.6	12.15	18.3	10.2	14.25	17.2	9.7	13.45	16.5	9.3	12.9	8.1	0	0	0	100	100	0	0	38.6	0.209845	20.9845	0	0	0	0	0
11	F	36		腰4椎体滑脱症（Ⅰ°峡部裂）	6	2	0	3	0	0	48	20	14	10	63	2012-12-31	L4	是	210	65	无	8.9	10.3	9.6	13.2	10.5	11.85	12.7	8.9	10.8	10.9	7.5	9.2	17.6	3.5	3.6	3.3	80.1136	81.25	-1.13636	1.13636	42.2	0.417062	41.7062	0.0829384	8.29384	0.0853081	0.0781991	7.81991
12	F	45		腰5椎峡部裂滑脱	7	3	2	0	0	0	48	20	14	8	62	2012-02-06	L5	是	140	40	无	20.6	11.8	16.2	17.6	10.3	13.95	16.8	9.8	13.3	16.3	9.2	12.75	3.5	0	0	0	100	100	0	0	19.5	0.179487	17.9487	0	0	0	0	0
13	F	44	设计师	腰5椎滑脱症（Ⅱ°、峡部裂）	7	3	2	5	0	0	46	33.3	0	10	72	2012-10-26	L5	是	180	90	无	12.5	8.5	10.5	13.7	10.6	12.15	11.5	9.6	10.55	10.6	8.7	9.65	11.2	7.6	7.8	8.1	32.1429	27.6786	4.46429	4.46429	43.8	0.255708	25.5708	0.173516	17.3516	0.178082	0.184932	18.4932
14	F	51		腰4椎体滑脱症（I° 峡部裂型）	6	2	2	3	0	0	50	16	14	10	58	2013-03-06	L4	是	169	75	无	21.5	9.3	15.4	19.2	12.9	16.05	18.6	10.8	14.7	18.2	9.9	14.05	8.9	5.1	4.5	5.5	42.6966	38.2022	4.49438	4.49438	38.1	0.233596	23.3596	0.133858	13.3858	0.11811	0.144357	14.4357
15	M	41	工人	腰5椎峡部裂滑脱	7	2	1	0	0	0	76	24	10	9	57	2013-02-25	L5	是	218	75	骨不连	13.4	12.7	13.05	13.9	12.1	13	16.7	10.6	13.65	18.4	9.6	14	5.7	0	0	0	100	100	0	0	44.7	0.127517	12.7517	0	0	0	0	0
16	F	41	无	腰4椎滑脱症（I°，峡部裂型）	6	2	1	0	0	0	48	20	4	9	67	2013-09-04	L4	是	207	60	无	19.2	7.6	13.4	19.5	11.8	15.65	16.1	10.3	13.2	15	7.3	11.15	9.2	3	3.6	3	67.3913	67.3913	0	0	37.5	0.245333	24.5333	0.08	8	0.096	0.08	8
17	F	41	无	腰5椎滑脱症（I°，峡部裂型）	7	2	2	5	0	0	50	16.7	10	9	61	2013-02-01	L5	是	264	130	输红细胞400ml，双侧大腿皮疹，肝功能异常	11.9	8.3	10.1	15.1	9.9	12.5	18.5	7.7	13.1	14.2	6.7	10.45	7	0	0	0	100	100	0	0	35	0.2	20	0	0	0	0	0
18	M	32	工人	腰5椎峡部裂滑脱，慢性乙型病毒性肝炎	6	2	0	0	0	0	53	16	12	9	58	2013-05-20	L5	是	182	65	肝功能异常	17.5	9.6	13.55	19.8	10.9	15.35	18.2	9.6	13.9	18.2	8.9	13.55	4.9	0	2.6	3	100	38.7755	61.2245	61.2245	38.5	0.127273	12.7273	0	0	0.0675325	0.0779221	7.79221
19	M	35	工人	腰5椎滑脱症（I°，峡部裂型）	6	2	1	3	0	0	56	10	12	9	57	2013-08-23	L5	是	288	50	无	12.6	7.8	10.2	16.9	11.2	14.05	16.3	10.8	13.55	15.1	10.4	12.75	9.5	4.5	5.5	6.8	52.6316	28.4211	24.2105	24.2105	39.9	0.238095	23.8095	0.112782	11.2782	0.137845	0.170426	17.0426
20	F	39	扭伤病史	腰5椎滑脱症（Ι度）、（峡部裂型）	5	2	0	0	0	0	48	24	12	10	56	2013-06-07	L5	是	160	130	无	19.8	8.2	14	13.7	9.8	11.75	13.2	9.3	11.25	12.6	8.8	10.7	10.2	5.5	4.8	4.9	46.0784	51.9608	-5.88235	5.88235	41.6	0.245192	24.5192	0.132212	13.2212	0.115385	0.117788	11.7788
21	F	44	工人	腰4椎滑脱症（I°，峡部裂型）	6	2	1	0	0	0	56	24	14	10	52	2013-02-22	L4	是	249	110	无	13.6	8.5	11.05	16.3	10.7	13.5	15.8	9.7	12.75	15.5	9.3	12.4	8.7	4.5	4.6	4.5	48.2759	48.2759	0	0	38.6	0.225389	22.5389	0.11658	11.658	0.119171	0.11658	11.658
22	M	22	军人	腰5椎峡部裂滑脱	6	2	0	0	0	0	50	25	6	10	58	2013-12-25	L5	是	205	70	无	20.6	6.3	13.45	21.7	10.3	16	20.1	9.5	14.8	21.6	12.7	17.15	4.2	0	0	0	100	100	0	0	38.9	0.107969	10.7969	0	0	0	0	0
23	M	23		腰5椎滑脱症（I°，峡部裂型）	6	2	0	0	0	0	48	25	12	10	57	2013-05-20	L5	是	157	50	无	16.7	9.8	13.25	18.3	11.6	14.95	17.3	10.7	14	16.9	10.3	13.6	10.1	4.8	3.5	3.8	52.4752	62.3762	-9.90099	9.90099	39.6	0.255051	25.5051	0.121212	12.1212	0.0883838	0.0959596	9.59596
24	F	37	手工工作	腰4椎体滑脱症（Ⅰ°）	6	3	2	0	0	0	42	26.7	6	9	55	2013-03-26	L4	是	262	70	无	13.2	8.6	10.9	16.7	10.2	13.45	16.3	9.8	13.05	15.6	9.6	12.6	8.9	5.3	4.5	4.3	40.4494	51.6854	-11.236	11.236	39.8	0.223618	22.3618	0.133166	13.3166	0.113065	0.10804	10.804
25	M	19	军人	腰4椎峡部裂滑脱	7	2	0	0	0	0	50	16.7	6	9	76	2014-03-06	L4	是	120	60	浅表伤口感染，抗菌药物治疗后好转	21.5	9.3	15.4	19.5	11.3	15.4	18.2	8.2	13.2	17.6	8.5	13.05	5	0	0	0	100	100	0	0	42.5	0.117647	11.7647	0	0	0	0	0
26	M	22	无	腰5椎滑脱症（I°，峡部裂型）	6	2	0	0	0	0	48	11.4	6	10	60	2014-05-27	L5	是	155	75	无	13.4	8.6	11	15.3	10.3	12.8	13.9	9.8	11.85	13.2	9.3	11.25	9.8	5.2	7.6	7.8	46.9388	20.4082	26.5306	26.5306	48.1	0.203742	20.3742	0.108108	10.8108	0.158004	0.162162	16.2162
27	M	38		腰5椎峡部裂滑脱	6	2	1	0	0	0	54	23.33	6	9	55	2014-08-26	L5	是	132	60	无	26.9	6.4	16.65	17.2	11.4	14.3	18.3	9.5	13.9	17.5	9.3	13.4	11.4	5.8	4.2	4.5	49.1228	60.5263	-11.4035	11.4035	49.2	0.231707	23.1707	0.117886	11.7886	0.0853659	0.0914634	9.14634
28	F	35	上班	腰5椎峡部裂滑脱	6	3	0	3	0	0	48	23.3	10	10	63	2014-08-14	L5	是	132	50	无	16.3	9.6	12.95	20.5	10.5	15.5	19.6	8.4	14	17.9	5.6	11.75	9.5	3.5	2.8	2.2	63.1579	76.8421	-13.6842	13.6842	41.5	0.228916	22.8916	0.0843373	8.43373	0.0674699	0.053012	5.3012
29	M	44	上班	腰5椎峡部裂滑脱	6	2	1	0	0	0	53	24	5	9	39	2014-08-30	L5	是	132	55	无	22.6	8	15.3	25.2	10.3	17.75	20.8	10.8	15.8	22.5	10.6	16.55	6.4	0	3.4	3	100	53.125	46.875	46.875	44.3	0.14447	14.447	0	0	0.0767494	0.0677201	6.77201
30	M	15	学生	腰5椎体滑脱症（Ⅰ°）	7	1	0	0	0	0	37.5	26.7	10	10	65	2014-08-04	L5	是	182	60	无	12.1	8.7	10.4	12.8	7.5	10.15	13.1	7.5	10.3	9.3	7.3	8.3	7.9	2.7	4.2	3	65.8228	62.0253	3.79747	3.79747	39.6	0.199495	19.9495	0.0681818	6.81818	0.106061	0.0757576	7.57576
31	M	27	上班，抬重物后出现	腰5椎峡部裂滑脱	6	1	0	0	0	0	50	13.3	5	10	51	2015-08-18	L5	是	166	60	无	13.9	9.9	11.9	16.8	10.1	13.45	13.5	7.2	10.35	13.2	7.1	10.15	9.2	3.9	3.2	3	57.6087	67.3913	-9.78261	9.78261	44.8	0.205357	20.5357	0.0870536	8.70536	0.0714286	0.0669643	6.69643
32	F	50	无	腰5椎峡部裂滑脱症（I°）	7	2	2	3	1	1	50	30	20	10	52	2015-04-14	L5	是	126	50	无	13.1	8.6	10.85	14.4	8.6	11.5	12.2	7.3	9.75	15.1	6.7	10.9	8.5	7.2	5	3.9	15.2941	54.1176	-38.8235	38.8235	39.4	0.215736	21.5736	0.182741	18.2741	0.126904	0.0989848	9.89848
33	M	27	工作，体能锻炼后疼痛	腰5椎峡部裂滑脱	6	2	0	0	0	0	42	20	5	9	55	2015-04-21	L5	是	209	30	无	18.2	7.3	12.75	23.3	11	17.15	18.3	10	14.15	16.5	9.3	12.9	5.6	0	0	0	100	100	0	0	42.4	0.132075	13.2075	0	0	0	0	0
34	M	22	无	腰5椎峡部裂滑脱	6	1	0	0	0	0	50	25	6	10	49	2015-11-09	L5	是	205	85	无	21.5	9.3	15.4	20.8	11.5	16.15	18.9	10.5	14.7	18.2	9.9	14.05	4.5	0	0	0	100	100	0	0	36.6	0.122951	12.2951	0	0	0	0	0
35	F	46	个体	腰5滑脱症（Ⅰ° 峡部裂型）	7	3	2	0	0	0	52	25	10	9	53	2015-12-03	L5	是	167	90	无	14.5	9.6	12.05	16.2	11.3	13.75	14.6	10.8	12.7	14.2	10.3	12.25	8.5	4.5	5	5.3	47.0588	37.6471	9.41176	9.41176	32.9	0.258359	25.8359	0.136778	13.6778	0.151976	0.161094	16.1094
36	M	46		腰5椎滑脱症（I°，峡部裂型），慢性乙型肝炎（小三阳）	6	2	2	0	0	0	48	16.7	12	9	46	2015-02-06	L5	是	159	60	无	21.1	12.3	16.7	22.4	10.5	16.45	20.3	10.2	15.25	19.8	9.7	14.75	10.9	4.6	3.6	4	57.7982	63.3028	-5.50459	5.50459	44.4	0.245495	24.5495	0.103604	10.3604	0.0810811	0.0900901	9.00901
37	F	44		腰5椎体滑脱症（I°峡部裂型）	7	3	1	0	0	0	50	20	10	9	57	2015-08-07	L5	是	228	100	无	6.7	5.4	6.05	11.6	6.2	8.9	5.2	5.5	5.35	6.4	5.9	6.15	7.6	5	7.5	7.6	34.2105	0	34.2105	34.2105	38.7	0.196382	19.6382	0.129199	12.9199	0.193798	0.196382	19.6382
38	M	41	厨师	腰5椎峡部裂滑脱（I°）	6	2	2	0	0	0	40	32	14	9	45	2015-02-05	L5	是	128	50	无	16.1	7.9	12	19.5	10.9	15.2	18.3	10.2	14.25	17.4	9.6	13.5	10	6.6	5.5	5.2	34	48	-14	14	42.4	0.235849	23.5849	0.15566	15.566	0.129717	0.122642	12.2642
39	M	23		腰4椎峡部裂滑脱	6	3	0	3	1	0	52	24	5	10	53	2015-08-24	L4	是	155	70	无	20.9	8.3	14.6	23	10.1	16.55	18.6	7.5	13.05	17.7	6.4	12.05	4.5	0	0	0	100	100	0	0	41	0.109756	10.9756	0	0	0	0	0
40	F	40	上班，摔倒外伤史	腰5椎体滑脱症（I°峡部裂型）	5	2	1	0	0	0	32.5	16	14	9	49	2015-04-30	L5	是	190	60	无	14.5	11.2	12.85	18.1	10.4	14.25	15.9	9.4	12.65	15.1	6.3	10.7	9.3	4.3	4.35	4.2	53.7634	54.8387	-1.07527	1.07527	38	0.244737	24.4737	0.113158	11.3158	0.114474	0.110526	11.0526
41	F	51	售货员	腰5椎体滑脱症（I°峡部裂型）	6	3	2	2	1	0	62	32	14	9	47	2015-03-28	L5	是	179	80	无	12.7	5.1	8.9	13.3	8.2	10.75	12.7	8	10.35	12.2	7.9	10.05	9	2.3	2	2.2	74.4444	75.5556	-1.11111	1.11111	39.4	0.228426	22.8426	0.0583756	5.83756	0.0507614	0.0558376	5.58376
42	F	45	上班	腰5椎体滑脱症（I°峡部裂型）	5	2	0	0	0	0	48	16	10	10	50	2015-12-24	L5	是	230	60	无	13.4	10.8	12.1	16.4	9.8	13.1	15.8	9.4	12.6	15.3	9.5	12.4	8.9	3.5	3.8	4	60.6742	55.0562	5.61798	5.61798	40.3	0.220844	22.0844	0.0868486	8.68486	0.0942928	0.0992556	9.92556
43	M	42	工人	腰5椎体滑脱症（I°峡部裂型）	6	2	1	0	0	0	48	25	12	9	36	2015-12-18	L5	是	155	60	无	22.3	6.1	14.2	25.3	10.9	18.1	24.7	10.5	17.6	23.8	9.7	16.75	7.5	4.7	4.3	3.8	37.3333	49.3333	-12	12	37.8	0.198413	19.8413	0.124339	12.4339	0.113757	0.100529	10.0529
44	M	28	设计工作	L4峡部裂滑脱	6	2	2	0	0	0	46	16	12	10	76	2015-09-23	L4	是	180	80	无	22.5	9	15.75	23.7	11.8	17.75	23.4	10.7	17.05	19.9	9.8	14.85	35	0	0	0	100	100	0	0	49.7	0.704225	70.4225	0	0	0	0	0
45	M	26	搬重物史	腰5椎滑脱（I 峡部裂型）	8	1	0	0	0	0	77.14	20	5	9	54	2015-11-24	L5	是	168	30	无	16	9.9	12.95	19.4	11.4	15.4	17.3	11	14.15	16.5	10.3	13.4	10	5.8	6	8.2	42	18	24	24	35.2	0.284091	28.4091	0.164773	16.4773	0.170455	0.232955	23.2955
46	F	48	家庭主妇，摔倒	腰4椎体滑脱症（I°峡部裂型）	6	1	1	3	0	0	40	20	10	9	67	2015-08-20	L4	是	210	50	无	12.4	8.7	10.55	15.8	12.9	14.35	14.7	11.5	13.1	9.7	9.3	9.5	10.5	3.5	4.3	5	66.6667	52.381	14.2857	14.2857	42.7	0.245902	24.5902	0.0819672	8.19672	0.100703	0.117096	11.7096
47	F	42	无	腰4椎滑脱症（I°，峡部裂型）	5	3	2	0	2	0	43	16	10	9	66	2015-03-31	L4	是	158	75	无	12.8	6.5	9.65	14.5	10.86	12.68	12.5	9.7	11.1	12.3	9.8	11.05	7.5	0	0	0	100	100	0	0	38.5	0.194805	19.4805	0	0	0	0	0
48	F	16	学生	L4峡部裂滑脱（I°）	6	3	1	0	0	0	46	20	5	10	61	2015-11-23	L4	是	185	85	无	17.8	8.7	13.25	19.3	9.9	14.6	18.5	8.9	13.7	17.2	9.1	13.15	6.5	0	0	0	100	100	0	0	39.3	0.165394	16.5394	0	0	0	0	0
49	M	22	饭店工作，搬重物	腰5椎峡部裂滑脱	7	1	0	0	0	0	56	16	10	9	43	2016-01-25	L5	是	203	90	无	17.9	7.9	12.9	18.8	9.8	14.3	17.2	8.5	12.85	16.3	8	12.15	3.8	0	0	0	100	100	0	0	37.6	0.101064	10.1064	0	0	0	0	0
50	F	18	学生	腰5椎峡部裂滑脱	7	3	1	0	0	0	51	33.33	2.5	9	72	2016-02-01	L5	是	180	75	骨不连	17.4	8.3	12.85	18.7	13.8	16.25	12.8	10.9	11.85	11.5	6.8	9.15	6	5.9	6.1	5.5	1.66667	8.33333	-6.66667	6.66667	42.6	0.140845	14.0845	0.138498	13.8498	0.143192	0.129108	12.9108
51	F	19	学生，军训后	腰5椎峡部裂滑脱	7	2	0	0	0	0	53	24	6	10	45	2016-01-25	L5	是	210	45	发热	15.7	7.8	11.75	21.7	14.6	18.15	18.3	12.6	15.45	16.4	9.5	12.95	9.2	7.1	6.9	6.4	22.8261	30.4348	-7.6087	7.6087	35.9	0.256267	25.6267	0.197772	19.7772	0.192201	0.178273	17.8273
52	M	20	上班	腰5椎峡部裂滑脱	6	2	0	0	0	0	56	23.33	5	9	42	2016-01-28	L5	是	240	60	发热	18.6	10.7	14.65	19.7	11.3	15.5	16.9	10.3	13.6	14.4	11.4	12.9	9.7	5.8	6.1	7.6	40.2062	21.6495	18.5567	18.5567	43.2	0.224537	22.4537	0.134259	13.4259	0.141204	0.175926	17.5926
53	M	28	无	腰5椎体峡部裂滑脱	7	1	0	0	0	0	48	26.7	15.56	9	50	2016-11-01	L5	是	293	70	无	17.6	5.3	11.45	19.6	9.1	14.35	19.3	5.8	12.55	17.4	5.4	11.4	4.3	0	0	0	100	100	0	0	34.9	0.123209	12.3209	0	0	0	0	0
54	M	28	上班	腰5椎峡部裂滑脱	6	2	1	4	1	0	71.11	17.1	14	9	48	2016-05-25	L5	是	163	75	发热，39.3	18.3	10.8	14.55	22.8	11.9	17.35	18.7	12.3	15.5	20.11	9.45	14.78	5.3	0	0	0	100	100	0	0	39.4	0.134518	13.4518	0	0	0	0	0
55	M	22		腰5椎峡部裂滑脱（I°）	6	3	0	0	0	0	56	32	6	9	45	2016.9.1	L5	是	150	50	无	17.3	9.3	13.3	19.8	11.2	15.5	18.6	10.7	14.65	17.5	10.2	13.85	8.6	0	0	0	100	100	0	0	39.7	0.216625	21.6625	0	0	0	0	0
56	F	58		腰5椎滑脱症（Ⅰ°峡部裂）	5	3	2	0	0	0	48	25	10	9	43	2016.5.23	L5	是	138	70	无	12.5	8.6	10.55	16.9	10.3	13.6	16.5	9.9	13.2	15.6	9.5	12.55	7.4	0	0	0	100	100	0	0	38.5	0.192208	19.2208	0	0	0	0	0
57	F	64		腰5椎滑脱症（Ⅰ°峡部裂）	6	4	1	0	0	0	52	33.3	14	8	38	2016.5.9	L5	是	186	100	无	16.5	7.9	12.2	19.2	9.7	14.45	18.8	9.6	14.2	18.1	9.2	13.65	10.7	3.8	4.1	4.5	64.486	57.9439	6.54206	6.54206	40.2	0.266169	26.6169	0.0945274	9.45274	0.10199	0.11194	11.194
58	F	53		腰5椎滑脱症（Ⅰ°峡部裂）	7	3	2	0	0	0	56	23.33	6	9	35	2016.7.15	L5	是	155	70	无	18.6	8.5	13.55	19.2	11.3	15.25	18.2	10.4	14.3	17.6	9.8	13.7	9.8	0	0	2.1	100	78.5714	21.4286	21.4286	39.8	0.246231	24.6231	0	0	0	0.0527638	5.27638
59	M	43	上班，高处跌落史	1.腰5椎体滑脱症（I°峡部裂型）；2.2型糖尿病	7	2	1	0	0	0	50	23.3	5	9	45	2016-10-19	L5	是	213	75	无	14.2	6.9	10.55	21.2	11.7	16.45	17.3	7.6	12.45	18.2	6.7	12.45	8	3.5	5.1	4.5	56.25	43.75	12.5	12.5	39.2	0.204082	20.4082	0.0892857	8.92857	0.130102	0.114796	11.4796
60	M	23	篮球运动	腰5椎体滑脱症（Ⅰ°）	7	2	1	0	0	0	34	20	14	9	60	2017-07-04	L5	是	270	100	上呼吸道感染	9	9.5	9.25	11.4	10.5	10.95	9.8	10.1	9.95	9	10.6	9.8	8.5	1.9	2	2.5	77.6471	70.5882	7.05882	7.05882	39.1	0.217391	21.7391	0.0485934	4.85934	0.0511509	0.0639386	6.39386
61	M	37	消防员	腰5椎滑脱症（I°，峡部裂型）	8	3	1	5	0	0	46	20	14	9	61	2017-06-13	L5	是	240	180	无	15.5	5.6	10.55	18.2	8.8	13.5	14.6	7.7	11.15	14.3	7.3	10.8	12.4	0	0	0	100	100	0	0	39.4	0.314721	31.4721	0	0	0	0	0
62	F	29	无	腰5椎滑脱症（I°，峡部裂型）	5	2	1	2	0	0	46	16.7	14	10	46	2017-02-21	L5	是	300	60	无	14.2	7.3	10.75	16.7	11.2	13.95	15.4	10.5	12.95	15.2	10.3	12.75	12.5	10.4	6.8	6.6	16.8	47.2	-30.4	30.4	35.5	0.352113	35.2113	0.292958	29.2958	0.191549	0.185915	18.5915
63	M	38	个体	腰5椎滑脱症（I°，峡部裂型）	7	3	2	0	0	0	46	20	14	10	36	2017-09-05	L5	是	270	50	发热	20.4	9	14.7	21.6	8.3	14.95	15.3	8.1	11.7	14.3	7.9	11.1	10	6.8	6.1	6	32	40	-8	8	38.4	0.260417	26.0417	0.177083	17.7083	0.158854	0.15625	15.625
64	F	49	上班	腰5椎滑脱症（I°，峡部裂型）	7	2	2	3	1	0	44	16	6	8	43	2017-02-14	L5	是	240	70	无	9.9	9.2	9.55	11.2	13.8	12.5	10.5	10	10.25	10.2	9.5	9.85	8.1	3.3	4.4	4.5	59.2593	44.4444	14.8148	14.8148	37	0.218919	21.8919	0.0891892	8.91892	0.118919	0.121622	12.1622
65	M	48	装修工人	腰4椎峡部裂滑脱	5	1	2	0	0	0	46	10	14	8	39	2017-02-21	L4	是	170	120	无	16.7	6.2	11.45	18.2	8.7	13.45	16.9	8.2	12.55	15.2	7.8	11.5	8.9	6.9	5.1	5	22.4719	43.8202	-21.3483	21.3483	40.7	0.218673	21.8673	0.169533	16.9533	0.125307	0.12285	12.285
66	F	22	上班，摔伤史	腰5椎峡部裂滑脱	7	2	0	0	0	0	46	25	10	10	33	2017-09-19	L5	是	218	30	药物性肝炎	19.9	6.6	13.25	16.7	10	13.35	14.5	10.1	12.3	13.7	9.6	11.65	6.5	3.5	4	4.2	46.1538	35.3846	10.7692	10.7692	38.8	0.167526	16.7526	0.0902062	9.02062	0.103093	0.108247	10.8247
67	M	16	学生，摔倒	腰4椎峡部裂滑脱	7	3	0	0	0	0	52	20	4.4	9	47	2017-01-25	L4	是	231	50	无	12.4	11.1	11.75	16.2	11.7	13.95	13	10.9	11.95	16.9	9.3	13.1	3.5	0	0	0	100	100	0	0	43.6	0.0802752	8.02752	0	0	0	0	0
68	F	43	工人	腰5椎峡部裂滑脱	6	3	1	0	0	0	56	20	14	8	39	2017-06-21	L5	是	276	110	无	8.5	7.8	8.15	10.1	5.3	7.7	7	5.5	6.25	6.8	5.2	6	8.9	3.8	3.1	3	57.3034	66.2921	-8.98876	8.98876	38.8	0.229381	22.9381	0.0979381	9.79381	0.0798969	0.0773196	7.73196
69	F	45	自由职业	腰5椎滑脱症（I度 峡部裂型）	6	2	2	0	0	0	46	23.33	20	9	32	2018-04-25	L5	是	347	50	无	14.1	7.5	10.8	16.3	11.3	13.8	15	10.3	12.65	14.7	9.8	12.25	14.1	4.5	4.8	4.7	68.0851	66.6667	1.41844	1.41844	43.9	0.321185	32.1185	0.102506	10.2506	0.109339	0.107062	10.7062
总数	69
男性	37
女性	32
L4	13	M 5	F 8
L5	56	M32	F 24
重体力劳动者	15
外伤史	11
[truncated: 35 more columns]

## Sheet: 融合组
一般信息					临床指标										FUT	手术相关指标						影像学资料
					VAS/lumbar			VAS/Leg			ODI（%）			Prolo评分								椎间隙高度												L5 滑移距离（slip distance， SD）				滑脱复位率			滑脱丢失率	L5 滑移百分比（slipping percentage，SP）
													0									术前椎间隙高度			术后椎间隙高度			术后半年			末次随访											椎体终板长度
姓名	性别	年龄	职业、诱因	诊断	术前	术后一周	末次随访	术前	术后一周	末次随访	术前	术后一周	末次随访	FFU		手术日期	手术节段	是否取髂骨	手术时长	出血量	并发症	椎间隙前缘	后缘	高度	椎间隙前缘	后缘	高度	椎间隙前缘	后缘	高度	椎间隙前缘	后缘	高度	术前	术后1周	术后6月	末次随访						术前		术后1周		术后6月	末次随访
1	M	68		腰4椎体滑脱症	6	4	2	0	0	0	46	26	20	8	56	2011.12.30	L4/5	否	320	300	无	9.6	7.5	8.55	15.2	10.3	12.75	14.5	9.6	12.05	14.3	9	11.65	7.3	2.3	2.8	3	68.4932	58.9041	9.58904	9.58904	38.2	0.191099	19.1099	0.0602094	6.02094	0.0732984	0.078534	7.8534
2	F	49		腰4椎体滑脱（Ⅱ°，峡部裂型）；高血压病	5	3	1	0	0	0	56	20	12	9	56	2012.3.9	L4/5	否	160	150	无	5.3	2.1	3.7	14.7	10.3	12.5	13.6	9.8	11.7	13.2	9.5	11.35	8.3	0	0	0	100	100	0	0	38.5	0.215584	21.5584	0	0	0	0	0
3	F	58		腰5椎体滑脱症(Ⅰ度)	5	3	2	7	3	0	70	30	16	9	52	2012.1.10	L5/S1	否	160	300	无	13.9	5.6	9.75	15.7	10.8	13.25	15.2	10.3	12.75	14.6	9.3	11.95	9	0	0	0	100	100	0	0	38.1	0.23622	23.622	0	0	0	0	0
4	F	50		腰5椎体滑脱症（Ⅱ°）	6	4	2	0	0	0	48	20	14	10	67	2012.2.13	L5/S1	否	210	250	无	12.3	8.3	10.3	18.7	10.3	14.5	18.3	9.9	14.1	18	9.7	13.85	9.6	-3.5	-3.2	-3	136.458	131.25	5.20833	5.20833	39.1	0.245524	24.5524	-0.0895141	-8.95141	-0.0818414	-0.0767263	-7.67263
5	F	56	无	腰4椎体滑脱症	5	2	1	2	0	0	52.5	15.5	16	10	45	2013.9.27	L4/5	否	160	100	无	13.2	6.3	9.75	17.5	8.7	13.1	15.1	6	10.55	14.7	6	10.35	9.5	0	0	0	100	100	0	0	43.3	0.2194	21.94	0	0	0	0	0
6	F	59	农民	腰5椎体滑脱症（Ⅱ°峡部裂型）	5	3	1	7	3	0	50.4	18	12	9	70	2013.11.19	L5/S1	否	210	300	伤口积液（subcutaneous seroma）	12.9	6.4	9.65	18.7	9.9	14.3	18.2	9.4	13.8	19.6	9.4	14.5	7.9	2.5	3.6	3.8	68.3544	51.8987	16.4557	16.4557	37.4	0.21123	21.123	0.0668449	6.68449	0.0962567	0.101604	10.1604
7	F	46		腰5椎滑脱症（II°峡部裂型）	5	3	0	4	2	0	50	26	10	10	55	2013.8.20	L5/S1	否	280	250	无	3.5	6.2	4.85	13.5	7.8	10.65	13	7.1	10.05	12.1	6.7	9.4	14.2	2.7	2.7	2.9	80.9859	79.5775	1.40845	1.40845	31.3	0.453674	45.3674	0.086262	8.6262	0.086262	0.0926518	9.26518
8	M	41		腰5椎体滑脱症（Ⅱ°，峡部裂型）；骶椎腰化	5	3	1	0	0	0	56	30	5	9	50	2013.4.20	L5/S1	否	260	200	无	5.3	2.1	3.7	17.6	8.5	13.05	17.3	8.2	12.75	17.3	8	12.65	14.7	3.5	3.7	3.7	76.1905	74.8299	1.36054	1.36054	39.8	0.369347	36.9347	0.0879397	8.79397	0.0929648	0.0929648	9.29648
9	F	51		腰5椎体滑脱症（II°）	7	3	1	0	0	0	50	20	10	9	48	2013.7.16	L5/S1	否	280	300	无	13.3	7.8	10.55	16.7	10.1	13.4	16.3	9.5	12.9	16.1	9.3	12.7	15.6	0	0	0	100	100	0	0	39.8	0.39196	39.196	0	0	0	0	0
10	F	73		腰5椎滑脱症（II°峡部裂型）	4	3	2	6	2	0	60	20	16	9	49	2013.9.25	L5/S1	否	210	200	无	12.1	5.3	8.7	17.1	7.8	12.45	16.8	7.8	12.3	16.5	7.6	12.05	8.5	4.4	4.5	4.5	48.2353	47.0588	1.17647	1.17647	30.8	0.275974	27.5974	0.142857	14.2857	0.146104	0.146104	14.6104
11	M	50		腰5椎滑脱症（II°，峡部裂型）	5	3	1	6	2	0	60	30	10	9	65	2013.12.13	L5/S1	否	324	300	无	7.8	4.3	6.05	16.8	10.3	13.55	16.5	10	13.25	16.2	9.7	12.95	12.5	0	0	0	100	100	0	0	38.7	0.322997	32.2997	0	0	0	0	0
12	F	45	打工	腰4椎滑脱症（II°，峡部裂型）	6	4	0	2	3	0	56	30	14	9	56	2013.10.16	L4/5	否	180	310	无	16.2	12.3	14.25	15.5	12.5	14	14.6	11.2	12.9	14.2	10.5	12.35	15.7	0	0	0	100	100	0	0	45.7	0.343545	34.3545	0	0	0	0	0
13	M	54	办公室，吊单杠摔伤史	腰5椎滑脱症（II°，峡部裂型）	5	3	1	0	0	0	48	20	6	10	66	2013.3.27	L5/S1	否	220	300	无	15.7	7.2	11.45	19.3	9.5	14.4	19.1	9.2	14.15	18.8	9.1	13.95	11.2	2	2.3	2.3	82.1429	79.4643	2.67857	2.67857	42.2	0.265403	26.5403	0.0473934	4.73934	0.0545024	0.0545024	5.45024
14	F	36	校医	腰4椎滑脱症（II°，峡部裂型）	6	2	2	0	0	0	56	16	20	9	64	2013.6.21	L4/5	否	200	500	无	15.3	6.8	11.05	12.9	9.3	11.1	12.1	9.1	10.6	11.6	8.4	10	13.5	0	0	0	100	100	0	0	34.3	0.393586	39.3586	0	0	0	0	0
15	F	37	无	腰5椎体滑脱症（峡部裂型II°）	4	2	0	4	2	0	43	24	10	9	57	2013.3.5	L5/S1	否	330	210	无	8.7	5.6	7.15	15.3	10.2	12.75	15	9.9	12.45	14.5	9.6	12.05	13.5	3.6	3.8	3.8	73.3333	71.8519	1.48148	1.48148	38.1	0.354331	35.4331	0.0944882	9.44882	0.0997375	0.0997375	9.97375
16	F	45	打工	1、腰4椎滑脱症（II°，峡部裂型）；2、高血压病 2级 极高危	6	2	0	4	1	0	54	26	2	9	55	2013.11.26	L4/5	否	200	300	伤口积液	1.6	2.5	2.05	19.7	9.4	14.55	19.2	8.8	14	18.9	8.4	13.65	13	0	0	0	100	100	0	0	33.5	0.38806	38.806	0	0	0	0	0
17	F	64		1、腰5椎滑脱症（II°，峡部裂型）；2、II型糖尿病；3、冠心病	7	3	2	0	0	0	76	26	0	9	45	2013.10.28	L5/S1	否	180	100	无	12.3	3.1	7.7	13.8	10.1	11.95	13.6	9.8	11.7	13.5	9.6	11.55	7.6	2.3	2.5	2.5	69.7368	67.1053	2.63158	2.63158	37.9	0.200528	20.0528	0.060686	6.0686	0.0659631	0.0659631	6.59631
18	F	43		腰5椎体滑脱症（II°）	5	2	1	6	2	0	54	24	12	9	59	2013.4.22	L5/S1	否	344	500	浅表伤口感染	9.8	6.9	8.35	13.5	9.6	11.55	12.8	9.5	11.15	12.5	9.1	10.8	15.2	3.8	5.1	5.3	75	65.1316	9.86842	9.86842	39.6	0.383838	38.3838	0.0959596	9.59596	0.128788	0.133838	13.3838
19	F	41	无	腰5椎滑脱症（I°，峡部裂型）	5	3	0	6	2	0	62	26	6	9	51	2013.3.6	L5/S1	否	180	150	无	9.6	7.8	8.7	13.5	11.9	12.7	13.3	11.5	12.4	13	11.2	12.1	7.1	0	0	0	100	100	0	0	40.5	0.175309	17.5309	0	0	0	0	0
20	F	42	无	腰4椎滑脱症（II°,峡部裂型）	6	2	0	0	0	0	50	26	14	9	57	2013.9.11	L4/5	否	180	200	无	10.5	0	5.25	18.9	11.4	15.15	18.6	11.3	14.95	18.2	11	14.6	13.6	0	0	0	100	100	0	0	38.2	0.356021	35.6021	0	0	0	0	0
21	F	50		腰4椎滑脱症（II°伴峡部裂）	3	2	0	6	2	1	42	30	4	9	53	2013.5.13	L4/5	否	270	200	无	2	5.8	3.9	9.6	12.3	10.95	9	11.7	10.35	8.8	11.6	10.2	9.7	5.1	5.5	5.5	47.4227	43.299	4.12371	4.12371	38.6	0.251295	25.1295	0.132124	13.2124	0.142487	0.142487	14.2487
22	F	49		腰5椎体滑脱症（I°峡部裂型）	5	2	0	6	1	0	56	20	10	10	72	2014.9.16	L5/S1	否	210	200	无	7.6	6.8	7.2	21.7	10.6	16.15	20.3	8.9	14.6	20	8.8	14.4	5.5	0	0	0	100	100	0	0	36.6	0.150273	15.0273	0	0	0	0	0
23	F	42	农民	腰5椎滑脱症(Ⅰ°峡部裂型）	4	3	0	7	3	1	70	38	20	9	54	2014.12.9	L5/S1	否	230	200	无	10.9	9.4	10.15	14.1	7.5	10.8	13.6	7.2	10.4	13.3	7.1	10.2	7.9	0	0	0	100	100	0	0	36.9	0.214092	21.4092	0	0	0	0	0
24	M	51	工人	腰4椎体滑脱（Ⅰ°，峡部裂型）	4	3	0	6	1	0	54	15	12	10	58	2014.6.11	L4/5	否	230	190	无	13.2	7.8	10.5	15.5	10.3	12.9	15	10	12.5	15	10	12.5	9.7	2.5	2.8	3	74.2268	69.0722	5.15464	5.15464	39.8	0.243719	24.3719	0.0628141	6.28141	0.0703518	0.0753769	7.53769
25	F	56	营业员	腰4椎滑脱症（II°，峡部裂型）	4	2	2	6	1	0	52	25.7	2	10	53	2014.4.10	L4/5	否	200	100	无	5.3	2.6	3.95	12.5	10.6	11.55	12.3	9.6	10.95	12	9.5	10.75	12.3	0	1.6	2	100	83.7398	16.2602	16.2602	38.5	0.319481	31.9481	0	0	0.0415584	0.0519481	5.19481
26	M	75		腰5椎体滑脱症（II°）；2.原发性高血压	5	3	1	6	2	1	56	30	12	9	52	2014.6.27	L5/S1	否	260	180	无	9.8	5.2	7.5	18.1	13.6	15.85	17.8	12.5	15.15	17.3	12.2	14.75	17.8	3.2	3.5	3.5	82.0225	80.3371	1.68539	1.68539	47.7	0.373166	37.3166	0.067086	6.7086	0.0733753	0.0733753	7.33753
27	F	47		腰5椎滑脱症（II°，峡部裂型）	4	2	1	3	1	0	50	20	0	9	55	2014.6.11	L5/S1	否	200	150	无	5.3	4.7	5	12.7	11	11.85	12.3	10.8	11.55	11.8	8.6	10.2	15.6	7	7.8	8.4	55.1282	46.1538	8.97436	8.97436	30.5	0.511475	51.1475	0.229508	22.9508	0.255738	0.27541	27.541
28	F	46	无	腰4椎体滑脱症（I° 峡部裂型）	6	3	0	0	0	0	56	26	0	9	52	2014.11.16	L4/5	否	240	200	无	5.2	2.4	3.8	13.9	9.5	11.7	13.6	9.3	11.45	13.5	9.1	11.3	7.1	-2.5	0	0	135.211	100	35.2113	35.2113	40.9	0.173594	17.3594	-0.0611247	-6.11247	0	0	0
29	F	50	无	腰4椎体滑脱症	3	2	0	0	0	0	42	5	2	9	50	2014.7.4	L4/5	否	150	100	浅表伤口感染	9.3	0	4.65	19.6	9.8	14.7	18.7	9.4	14.05	13.1	8.7	10.9	9.7	0	2.7	2.9	100	70.1031	29.8969	29.8969	39.1	0.248082	24.8082	0	0	0.0690537	0.0741688	7.41688
30	F	52	举重物后腰痛史	腰5椎体滑脱症（II°，峡部裂型）	5	3	1	7	2	0	47.5	18	4	9	50	2014.5.23	L5/S1	否	197	180	浅表伤口感染	4.5	0	2.25	12.5	9.1	10.8	11.8	9	10.4	10.9	8.7	9.8	18.7	4.5	5.3	6	75.9358	67.9144	8.02139	8.02139	41.2	0.453883	45.3883	0.109223	10.9223	0.128641	0.145631	14.5631
31	F	46		腰5椎滑脱症（II°，峡部裂型）	5	3	0	7	2	0	70	30	6	10	53	2014.6.3	L5/S1	否	260	300	无	13.7	8.6	11.15	19.6	12.5	16.05	18.8	11.8	15.3	18.5	11.4	14.95	7.8	3.1	3.7	4	60.2564	48.7179	11.5385	11.5385	39.8	0.19598	19.598	0.0778894	7.78894	0.0929648	0.100503	10.0503
32	F	52		腰4椎滑脱症（II°，峡部裂型）	5	3	1	0	0	0	50	26	14	9	48	2014.7.14	L4/5	否	150	80	无	4.7	5.9	5.3	19.7	10.6	15.15	17.7	10.1	13.9	17.3	9.7	13.5	13.6	0	0	0	100	100	0	0	38.8	0.350515	35.0515	0	0	0	0	0
33	F	59		腰4椎滑脱症（II°，峡部裂型）	5	2	1	0	0	0	46	16	5.7	9	55	2014.3.6	L4/5	否	170	200	无	17.5	8.2	12.85	20.3	9.3	14.8	19.4	8.5	13.95	18.1	8.6	13.35	7.6	0	0	0	100	100	0	0	38.4	0.197917	19.7917	0	0	0	0	0
34	M	41	上班	腰5椎滑脱症（II°，峡部裂型）	4	2	0	6	1	0	50	24	14	10	58	2014.8.23	L5/S1	否	180	100	无	7.3	3.8	5.55	13.6	7.7	10.65	13.3	7.5	10.4	13	7.2	10.1	12.3	3.6	3.9	4	70.7317	67.4797	3.25203	3.25203	38.6	0.318653	31.8653	0.0932642	9.32642	0.101036	0.103627	10.3627
35	M	57	教师	腰4椎滑脱症（Ⅱ°，峡部裂型）	4	2	0	6	1	0	56	32	20	9	53	2014.4.2	L4/5	否	180	150	无	10.5	6.8	8.65	19.5	10.3	14.9	18.7	10.2	14.45	18.4	9.8	14.1	9.7	0	0	0	100	100	0	0	46	0.21087	21.087	0	0	0	0	0
36	M	67	无	腰4椎滑脱（II°，峡部裂型）	6	3	2	5	2	0	54	20	20	8	72	2014.11.28	L4/5	否	210	300	无	14	6.4	10.2	18.1	8.2	13.15	18	7.8	12.9	17.9	7.8	12.85	10	2.3	2.6	2.7	77	73	4	4	42.7	0.234192	23.4192	0.0538642	5.38642	0.0608899	0.0632319	6.32319
37	M	60	工人	1、腰5椎滑脱症（II°，峡部裂型），2、 2型糖尿病	4	2	1	6	1	0	60	28	12	10	46	2015.1.6	L5/S1	否	150	100	无	12.1	13.4	12.75	18.8	8.6	13.7	14.6	8.3	11.45	14.5	8.3	11.4	14.1	4.3	4.3	4.3	69.5035	69.5035	0	0	40.1	0.351621	35.1621	0.107232	10.7232	0.107232	0.107232	10.7232
38	M	58	农民	腰5椎滑脱症（II°，峡部裂型）	4	2	2	5	1	0	48	11.4	20	9	52	2015.3.19	L5/S1	否	310	200	无	4.3	0	2.15	15.2	9.1	12.15	14.7	9	11.85	14.4	8.8	11.6	18.4	8.5	8.8	8.9	53.8043	51.6304	2.17391	2.17391	43.2	0.425926	42.5926	0.196759	19.6759	0.203704	0.206019	20.6019
39	F	52	无	腰5椎滑脱症（I°，峡部裂型）	5	2	1	3	1	0	50	30	10	8	63	2015.8.31	L5/S1	否	170	100	无	16.5	2.5	9.5	21.2	8.9	15.05	21	8.5	14.75	19.2	8.4	13.8	15.6	0	0	0	100	100	0	0	42.4	0.367925	36.7925	0	0	0	0	0
40	F	46	无	腰5椎滑脱症（II°，峡部裂型）	4	3	0	6	2	0	60	20	16	10	39	2015.3.16	L5/S1	否	300	200	无	10.5	5.6	8.05	15.5	6	10.75	15.2	5.6	10.4	14.8	5.5	10.15	12.5	7.7	7.9	7.9	38.4	36.8	1.6	1.6	38.8	0.322165	32.2165	0.198454	19.8454	0.203608	0.203608	20.3608
41	M	52		腰5椎滑脱（I°，峡部裂型），2.高血压 III级，极高危险组，	4	1	2	6	0	0	52	30	6	10	53	2015.11.23	L5/S1	否	270	170	无	12.7	4.4	8.55	14.8	6.8	10.8	13.5	7.1	10.3	13.3	7	10.15	9.6	0	1.9	2	100	79.1667	20.8333	20.8333	40	0.24	24	0	0	0.0475	0.05	5
42	M	43	无	腰4椎滑脱症（Ⅱ° 峡部裂型）	5	3	0	4	1	0	48	26	16	10	55	2015.11.24	L4/5	否	218	300	脑脊液漏	4.6	3.6	4.1	13.7	9.7	11.7	12.4	9.3	10.85	12	8.6	10.3	17.1	1.8	2	2	89.4737	88.3041	1.16959	1.16959	37.9	0.451187	45.1187	0.0474934	4.74934	0.0527704	0.0527704	5.27704
43	F	42	摔伤史	腰5椎体滑脱症（I°峡部裂型），高血压	4	3	0	6	2	0	56	34	6	10	65	2015.7.10	L5/S1	否	230	300	无	11.5	5.6	8.55	15.7	9.9	12.8	15.4	9.2	12.3	15	9	12	9	0	0	0	100	100	0	0	36.7	0.245232	24.5232	0	0	0	0	0
44	F	56		腰5椎体滑脱症（II°峡部裂型）	6	3	1	0	0	0	54	22.4	6	9	54	2015.5.14	L5/S1	否	240	400	无	5.5	3.8	4.65	19.3	9.5	14.4	18.5	8.9	13.7	19.5	9.1	14.3	11.4	0	1.8	1.7	100	85.0877	14.9123	14.9123	38.1	0.299213	29.9213	0	0	0.0472441	0.0446194	4.46194
45	F	66	退休人员	腰5椎滑脱症（Ⅱ°，峡部裂型）	5	3	2	4	1	0	46	24	16	10	51	2015.9.25	L5/S1	否	280	200	无	3.7	0	1.85	13.9	8.4	11.15	13.2	8.1	10.65	13	7.8	10.4	14.4	0	0	0	100	100	0	0	42.1	0.342043	34.2043	0	0	0	0	0
46	M	44		腰5椎滑脱症（II°，峡部裂型）	5	2	0	6	1	0	56	20	14	9	57	2015.5.25	L5/S1	否	150	80	无	9.5	8.6	9.05	20.7	14.1	17.4	20.3	13.9	17.1	19.5	13.2	16.35	14.5	-2	0	0	113.793	100	13.7931	13.7931	41.7	0.347722	34.7722	-0.0479616	-4.79616	0	0	0
47	F	48		腰4椎体滑脱症	4	2	1	6	1	0	56	20	2	9	45	2015.6.23	L4/5	否	255	320	无	7.7	6	6.85	15.1	12.5	13.8	15	12	13.5	14.6	11.7	13.15	10.1	2.5	3	3	75.2475	70.297	4.9505	4.9505	41.7	0.242206	24.2206	0.059952	5.9952	0.0719424	0.0719424	7.19424
48	M	41		腰5椎体滑脱症(Ⅰ度)	4	3	0	6	1	0	52	24	10	9	48	2016.12.7	L5/S1	否	200	120	无	9.6	4.3	6.95	16.7	10.5	13.6	15.4	9.9	12.65	14.8	9.6	12.2	12.2	3.7	4.5	4.5	69.6721	63.1148	6.55738	6.55738	37.6	0.324468	32.4468	0.0984043	9.84043	0.119681	0.119681	11.9681
49	F	50		腰5椎滑脱症（Ⅱ°峡部裂型）	5	4	1	3	0	0	48	28	12	8	46	2016.8.4	L5/S1	否	180	320	无	5.2	3.2	4.2	15.6	9.7	12.65	14.3	9.5	11.9	14.2	9.2	11.7	10.5	2.5	3	3.2	76.1905	69.5238	6.66667	6.66667	40.13	0.26165	26.165	0.0622975	6.22975	0.074757	0.0797408	7.97408
50	F	62		腰5椎体Ⅰ°滑脱（峡部裂型）	6	3	2	4	0	0	56	30	10	9	45	2016.8.8	L5/S1	否	220	200	无	10.6	4.7	7.65	15.3	10.2	12.75	14.7	9.8	12.25	13.8	9.7	11.75	13.2	3.8	4	4.7	71.2121	64.3939	6.81818	6.81818	38.6	0.341969	34.1969	0.0984456	9.84456	0.103627	0.121762	12.1762
51	F	51		腰5椎体Ⅰ°滑脱（峡部裂型）	4	2	1	6	2	0	54	20	16	8	56	2016.8.4	L5/S1	否	200	300	无	9.3	2.5	5.9	16.3	9.8	13.05	15.8	9.9	12.85	14.9	9.6	12.25	9.8	0	0	0	100	100	0	0	38.2	0.256545	25.6545	0	0	0	0	0
52	F	33	摔倒史	腰4椎体滑脱症（Ⅰ°峡部裂型）	6	3	0	4	2	0	68	33.3	10	9	51	2016.7.19	L4/5	否	210	260	无	18.4	7.9	13.15	20.7	7.7	14.2	20.9	7.1	14	20.1	6.7	13.4	7.2	0	0	0	100	100	0	0	41.4	0.173913	17.3913	0	0	0	0	0
53	F	53		L5椎体滑脱症（峡部裂型，Ⅱ°）	5	2	0	6	1	0	48	18	12	9	50	2016.8.2	L5/S1	否	170	150	无	7.3	3.5	5.4	17.8	12.3	15.05	16.5	11.3	13.9	15.5	12	13.75	12.8	2.6	3.5	3.5	79.6875	72.6562	7.03125	7.03125	39.6	0.323232	32.3232	0.0656566	6.56566	0.0883838	0.0883838	8.83838
54	F	51		腰4椎体滑脱症（II°峡部裂型）	5	4	1	6	2	0	43	26	14	9	52	2016.6.20	L4/5	否	185	180	无	9.2	3.1	6.15	16.4	10.7	13.55	15.7	10.4	13.05	14.8	9.8	12.3	13.6	3.7	4.3	4.5	72.7941	66.9118	5.88235	5.88235	37.5	0.362667	36.2667	0.0986667	9.86667	0.114667	0.12	12
55	M	40		腰4椎滑脱症（II°，峡部裂型）	6	4	1	0	0	0	56	34	10	9	50	2016.8.2	L4/5	否	180	100	无	10.3	6.5	8.4	17.1	9.5	13.3	16	9.5	12.75	15.4	7.2	11.3	9.6	2	2.7	2.7	79.1667	71.875	7.29167	7.29167	42.2	0.227488	22.7488	0.0473934	4.73934	0.063981	0.063981	6.3981
56	F	59		腰5椎体滑脱症（II°峡部裂型）	5	3	1	4	2	0	50	14.4	5	9	48	2016.3.14	L5/S1	否	200	300	无	11.1	2.1	6.6	16.5	6.7	11.6	16.4	6.7	11.55	16.1	6.5	11.3	10.7	2	2.2	2.5	81.3084	76.6355	4.6729	4.6729	37.2	0.287634	28.7634	0.0537634	5.37634	0.0591398	0.0672043	6.72043
57	F	54		腰5椎体滑脱症（II°峡部裂型）	6	2	2	4	0	0	52	20	12	8	47	2016.4.24	L5/S1	否	170	220	无	7.8	2.3	5.05	18.5	11.3	14.9	17.6	10.8	14.2	16.6	10	13.3	12.5	0	0	0	100	100	0	0	40.4	0.309406	30.9406	0	0	0	0	0
58	F	47	上班	腰5椎体滑脱症（II°峡部裂型）	4	2	0	6	0	0	48	28	2.5	9	61	2016.8.16	L5/S1	否	300	500	无	6.8	3.1	4.95	17.7	10.4	14.05	17	7.6	12.3	16.7	7.4	12.05	17.1	0	2	2.8	100	83.6257	16.3743	16.3743	39.5	0.432911	43.2911	0	0	0.0506329	0.0708861	7.08861
59	M	62		腰5椎滑脱症（II°峡部裂型）	4	2	2	6	1	0	50	17.1	5	8	63	2016.10.21	L5/S1	否	200	150	无	13.9	6.8	10.35	22.7	14.2	18.45	19.5	12.7	16.1	18.6	12.1	15.35	13.2	4.5	7.5	7.6	65.9091	42.4242	23.4848	23.4848	35.2	0.375	37.5	0.127841	12.7841	0.213068	0.215909	21.5909
60	M	58	退休人员	1.腰4椎滑脱症（Ⅰ°峡部裂型）；2.慢性乙型病毒性肝炎	5	2	1	6	1	0	46	26	4	9	58	2016.2.22	L4/5	否	200	100	无	5.5	5	5.25	16.1	5.4	10.75	15.7	5.4	10.55	15.2	5.1	10.15	11.9	0	0	0	100	100	0	0	42.7	0.278689	27.8689	0	0	0	0	0
61	F	56		腰4椎滑脱（I°）	6	3	1	3	0	0	56	30	10	9	55	2017.2.9	L4/5	否	230	200	无	10.3	3.5	6.9	16.3	10.1	13.2	15.4	9.9	12.65	14.5	9.7	12.1	11.7	3.2	3.5	4.2	72.6496	64.1026	8.54701	8.54701	37.8	0.309524	30.9524	0.0846561	8.46561	0.0925926	0.111111	11.1111
62	M	65	无	腰4椎滑脱（峡部裂型，II度）	4	2	2	5	2	0	48	20	6	9	59	2017.8.15	L4/5	否	280	800	无	2	0	1	16.4	10.1	13.25	15.1	10.7	12.9	15	10.5	12.75	14.1	8.6	8.3	8.5	39.0071	39.7163	-0.70922	0.70922	41.8	0.337321	33.7321	0.205742	20.5742	0.198565	0.203349	20.3349
63	F	52		腰5椎滑脱（II°峡部裂型）	4	2	2	6	2	0	52	28	16	9	56	2017.7.26	L5/S1	否	205	300	无	12.3	3.8	8.05	17.3	7.3	12.3	16.2	6.7	11.45	16	6.6	11.3	6.5	0	0	0	100	100	0	0	31.7	0.205047	20.5047	0	0	0	0	0
64	M	54	工人	腰3椎滑脱症（Ⅰ° 峡部裂型），2型糖尿病	4	3	2	6	3	0	70	30	5	10	57	2017.5.23	L3/4	否	300	500	无	6.1	4.3	5.2	16.5	7.2	11.85	15.7	5.3	10.5	15.5	5.2	10.35	9	-3.2	-3.5	-3.5	135.556	138.889	-3.33333	3.33333	44.6	0.201794	20.1794	-0.0717489	-7.17489	-0.0784753	-0.0784753	-7.84753
65	F	48	无	腰4椎体滑脱症（Ⅱ°峡部裂型）	5	2	0	4	1	0	40	17.1	10	9	45	2017.3.21	L4/5	否	220	150	无	6.8	5.5	6.15	19.4	8.5	13.95	18	8.7	13.35	17.8	8.5	13.15	18.5	0	0	0	100	100	0	0	41.4	0.44686	44.686	0	0	0	0	0
66	F	50	驾驶员	腰4椎滑脱症（Ⅱ°峡部裂型）	5	2	1	0	0	0	46	20	12	9	39	2017.4.26	L4/5	否	200	120	无	13.5	8.4	10.95	16.2	6.9	11.55	16	6.6	11.3	15.7	6.4	11.05	9.5	0	0	0	100	100	0	0	37.5	0.253333	25.3333	0	0	0	0	0
67	F	67	无	腰5椎滑脱	3	3	2	7	1	1	50	24	20	9	48	2018.7.27	L5/S1	否	200	150	无	12.16	5.43	8.795	13.14	6.72	9.93	12.3	9.6	10.95	12.1	9.2	10.65	12.15	3.5	3.8	4.1	71.1934	66.2551	4.93827	4.93827	40.31	0.301414	30.1414	0.0868271	8.68271	0.0942694	0.101712	10.1712
68	M	49		腰5椎滑脱（II°）	3	3	0	6	2	1	48	18	16	9	43	2018.11.12	L5/S1	否	160	120	无	3.38	4.07	3.725	16.91	9.35	13.13	15.2	12.3	13.75	14.7	11.8	13.25	9.47	0	0	0	100	100	0	0	35.6	0.266011	26.6011	0	0	0	0	0
69	F	69	农民	1、腰4椎体滑脱症（Ⅱ°）峡部裂型 2、双侧退行性膝关节炎 3、高血压3级极高危 4、高血压心脏病 4、多发腔隙性脑梗 5、重度骨质疏松症	5	3	2	0	0	0	50	24	20	9	45	2018.5.17	L4/5	否	120	110	无	4.6	7.2	5.9	17.5	9	13.25	12.2	9	10.6	12	8.6	10.3	14.4	0	0	0	100	100	0	0	45.7	0.315098	31.5098	0	0	0	0	0
70	M	47	个体	腰5椎滑脱（II°）	6	2	2	3	0	0	43	30	6	9	36	2018.12.18	L5/S1	否	150	120	无	18.16	3.94	11.05	24.51	6.04	15.275	21.8	5.57	13.685	18.7	5.35	12.025	10.55	0	0	0	100	100	0	0	37.66	0.280138	28.0138	0	0		0	0
71	F	46	无	腰4椎滑脱（II°）	4	2	1	6	1	0	46	23.3	5	9	39	2018.12.19	L4/5	否	245	200	无	13.04	7.18	10.11	15.12	14.13	14.625	13.97	12.22	13.095	13.24	11.15	12.195	8.88	0	0	0	100	100	0	0	40.26	0.220566	22.0566	0	0		0	0
总数	71
男性	22
女性	49
L3	1	M 1
L4	28	M 8	F 20
L5	42	M 13	F 29
[truncated: 35 more columns]
